# Supplementary material for: Diversity of the Microbiota of Traditional Izmir Tulum and Izmir Brined Tulum Cheeses and Selection of Potential Probiotics
Source: MDPI journal article supplement (doi:10.3390/foods12183482), 2023-09-19
Supplement: s1 [file s1]

Table S1. Cheese samples used in the study

| Dairy Code | Sample Code | Cheese Type | Aging     | Age (months) | Analysis Applied to Cheese Samples |                            |                                                                |
|------------|-------------|-------------|-----------|--------------|------------------------------------|----------------------------|----------------------------------------------------------------|
|            |             |             |           |              | Culture-independent analysis       | Culture-dependent analysis | Mining for lactobacilli strains with probiotic characteristics |
| A          | AD          | IT*         | Skin bag  | 14           | YES                                | YES                        | NO                                                             |
| C          | CD          | IT          | Skin bag  | 10           |                                    |                            |                                                                |
| H          | HD          | IT          | Skin bag  | 22           |                                    |                            |                                                                |
| L          | LD          | IT          | Skin bag  | 14           |                                    |                            |                                                                |
| N          | ND          | IT          | Skin bag  | 14           |                                    |                            |                                                                |
| A          | 12A         | IBT**       | Brine/Can | 8            |                                    |                            |                                                                |
| H          | 16H         | IBT         | Brine/Can | 10           |                                    |                            |                                                                |
| C          | 17C         | IBT         | Brine/Can | 10           |                                    |                            |                                                                |
| N          | 20N         | IBT         | Brine/Can | 8-9          | NO                                 |                            | YES                                                            |
| N          | 21N         | IBT         | Brine/Can | 8-9          |                                    |                            |                                                                |
| N          | 9N          | IBT         | Brine/Can | 8            |                                    |                            |                                                                |
| N          | 10N         | IBT         | Brine/Can | 8            |                                    |                            |                                                                |
| R          | 3R          | IBT         | Brine/Can | 8            |                                    |                            |                                                                |
| R          | 4R          | IBT         | Brine/Can | 8            |                                    |                            |                                                                |

\* Izmir Tulum Cheese    \*\* Izmir Brined Tulum Cheese
